# Supplementary material for: Site selection by geese in a suburban landscape
Source: PubMed Central journal article supplement (PMC7518184; doi:10.7717/peerj.9846), 2020-09-22

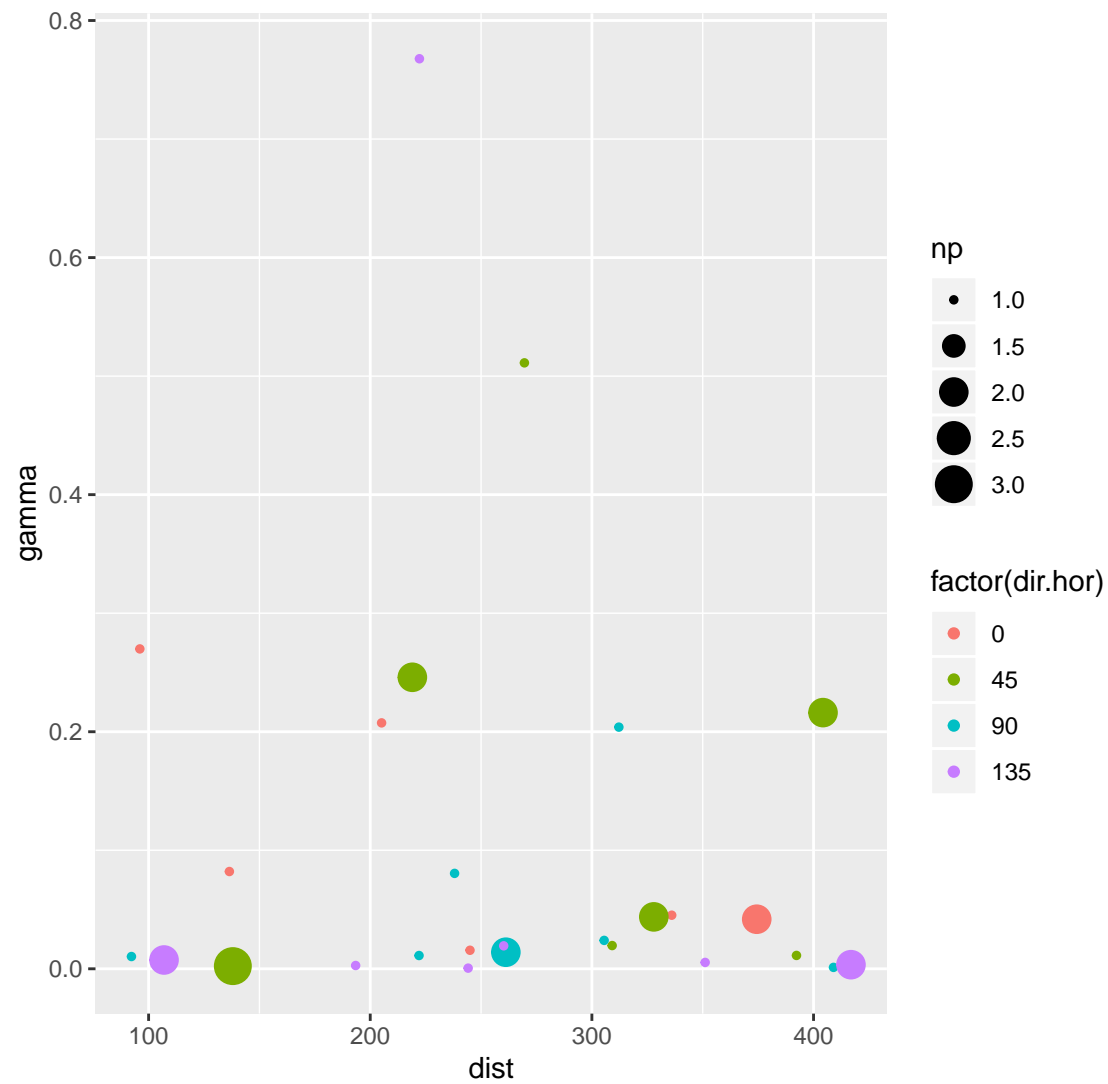

Supplement: peerj-08-9846-s005.pdf [file peerj-08-9846-s005.pdf]
